# Supplementary material for: The alveolar immune cell landscape is dysregulated in checkpoint inhibitor pneumonitis
Source: JCI journal article supplement (doi:10.1172/jci128654), 2019-07-16
Supplement: sd2 [file 2]

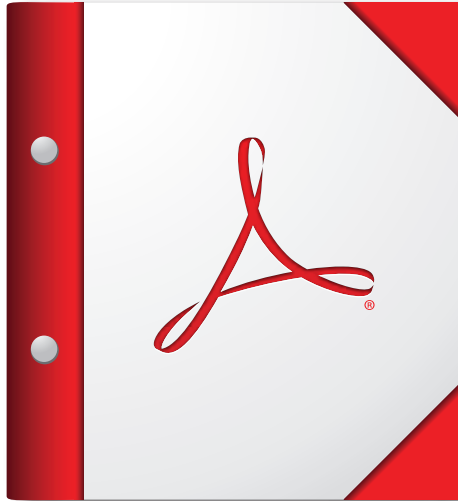

**For the best experience, open this PDF portfolio in  
Acrobat X or Adobe Reader X, or later.**

**Get Adobe Reader Now!**
